# Supplementary material for: De novo individualized disease modules reveal the synthetic penetrance of genes and inform personalized treatment regimens
Source: HighWire-hosted journal article supplement (doi:10.1101/gr.275889.121), 2021-12-07
Supplement: Supplemental_Table_S5.xlsx [file Supplemental_Table_S5.xlsx]

## Sheet: Sheet1
Supplemental Table S5. Data on target therapy drugs and their target proteins.
Drug	Target	Source	Included	Breast Cancer Approved	Breast Cancer Indication
atezolizumab	PD-L1	DrugBank		Y
abemaciclib	CDK4	DrugBank	Y	Y	ER+ PR+
abiraterone acetate	CYP17A1	DrugBank
acalabrutinib	BTK	DrugBank	Y
ado-trastuzumab emtansine	ERBB2	DrugBank	Y	Y	HER2+
afatinib dimaleate	EGFR, ERBB2, ERBB4	DrugBank	Y
alectinib	ALK	DrugBank	Y
alemtuzumab	CD52 and FC recpetors	DrugBank
alitretinoin	Many retinoin receptors	DrugBank
alpelisib	PIK3CA	DrugBank	Y	Y	ER+ PR+
anastrozole	CYP19A1	DrugBank		Y
apalutamide	AR	DrugBank
atezolizumab	CD274	DrugBank
avapritinib	KIT	DrugBank	Y
avelumab	CD274	DrugBank
axicabtagene ciloleucel	CAR-T Treatment	DrugBank
axitinib	VEGF	DrugBank	Y
belinostat	HDAC	DrugBank	Y
bevacizumab	VEGF	DrugBank	Y
bexarotene	Many retinoin receptors	DrugBank
binimetinib	Kinase inhibitor	DrugBank
blinatumomab	CD19	DrugBank
bortezomib	PSMB5	DrugBank	Y
bosutinib	BCR-ABL, AXL	DrugBank	Y
brentuximab vedotin	TNFSF8/CD30L	DrugBank
brigatinib	mutant EGFR and ALK	DrugBank	Y
britumomab tiuxetan	CD20	DrugBank
cabazitaxel	cytoskeleton- tubulin	DrugBank
cabozantinib	non-specific tyrosine kinase inhibitor	DrugBank
capmatinib hydrochloride	MET	DrugBank
carfilzomib	proteasome inhibitor	DrugBank
cemiplimab-rwlc	PDCD1	DrugBank	Y
ceritinib	ALK	DrugBank	Y
cetuximab	EGFR	DrugBank	Y
cobimetinib	MAP kinase inhibitor	DrugBank	Y
copanlisib hydrochloride	PIK3CA	DrugBank	Y
crizotinib	ROS1	DrugBank	Y
dabrafenib	eversible ATP-competitive kinase inhibitor	DrugBank
dacomitinib	EGFR	DrugBank	Y
daratumumab	CD38	DrugBank	Y
darolutamide	AR	DrugBank
dasatinib	Src family tyrosine kinase inhibitor	DrugBank
denileukin diftitox	cytotoxic diptheria toxin	DrugBank
denosumab	TNFSF11	DrugBank	Y
dinutuximab	anti-ganglioside	DrugBank
durvalumab	PD-L1	DrugBank
duvelisib	phosphoinositide-3 kinases	DrugBank
elotuzumab	SLAMF7	DrugBank	Y
enasidenib mesylate	IDH2	DrugBank	Y
encorafenib	BRAF, CCND1	DrugBank	Y
enfortumab vedotin-ejfv	NECTIN4	DrugBank
entrectinib	receptor tyrosine kinase inhibitor	DrugBank
enzalutamide	AR	DrugBank
erdafitinib	FGFR	DrugBank	Y
erlotinib	EGFR	DrugBank	Y
everolimus	MTOR	DrugBank	Y	Y	ER+ PR+
exemestane	CYP19A1	DrugBank		Y
fedratinib hydrochloride	tyrosine kinase inhibitor	DrugBank
fulvestrant	ESR1	DrugBank		Y
gefitinib	EGFR	DrugBank	Y
gemtuzumab ozogamicin	CD33	DrugBank
gilteritinib	FLT3 tyrosine kinase inhibitors	DrugBank
glasdegib maleate	SMO	DrugBank	Y
ibrutinib	BTK	DrugBank	Y
idelalisib	PIK3CD	DrugBank
imatinib mesylate	kinase inhibitor	DrugBank
inotuzumab ozogamicin	CD22	DrugBank	Y
iobenguane I 131	radioisotope	DrugBank
ipilimumab	CTLA-4	DrugBank
isatuximab-irfc	CD38	DrugBank	Y
ivosidenib	IDH1	DrugBank	Y
ixazomib citrate	proteasome inhibitor	DrugBank
lanreotide acetate	growth hormone inhibitor	DrugBank
lapatinib	ERBB2	DrugBank	Y	Y	HER2+
larotrectinib sulfate	NTRK1, NTRK2, NTRK3	DrugBank	Y
lenvatinib mesylate	VEGF, FGFR, PDGFR, KIT, RET	DrugBank	Y
letrozole	CYP19A1	DrugBank		Y
lorlatinib	ALK	DrugBank	Y
lutetium Lu 177-dotatate	Peptide Receptor Radionuclide Therapy	DrugBank
midostaurin	multitarget kinase inhibitor	DrugBank
mogamulizumab-kpkc	CCR4	DrugBank
moxetumomab pasudotox-tdfk	CD22	DrugBank	Y
necitumumab	EGFR	DrugBank	Y
neratinib maleate	EGFR	DrugBank	Y	Y	v
nilotinib	ABL1, KIT	DrugBank	Y
niraparib tosylate monohydrate	PARP1, PARP2	DrugBank	Y
nivolumab	PD-1	DrugBank
obinutuzumab	MS4A1	DrugBank
ofatumumab	CD20	DrugBank
olaparib	PARP1, PARP2, PARP3, PARP4	DrugBank	Y	Y	BRCA mutant
osimertinib	EGFR	DrugBank	Y
palbociclib	CDK4, CDK6	DrugBank	Y	Y	ER+ PR+
panitumumab	EGFR	DrugBank	Y
panobinostat	Histone deacetylase	DrugBank	Y
pazopanib	tyrosine kinases	DrugBank
pembrolizumab	PD-1	DrugBank
pemigatinib	kinase inhibitor	DrugBank
pertuzumab	ERBB2	DrugBank	Y	Y	HER2+
pexidartinib hydrochloride	tyrosine kinase inhibitor	DrugBank
polatuzumab vedotin-piiq	CD79B	DrugBank
ponatinib hydrochloride	Bcr-Abl tyrosine kinase inhibitor	DrugBank
pralatrexate	DHFR	DrugBank
pralsetinib	kinase inhibitor	DrugBank
radium 223 dichloride	radiopharmaceutical	DrugBank
ramucirumab	VEGF	DrugBank	Y
regorafenib	kinase inhibitor	DrugBank
ribociclib	CDK4, CDK6	DrugBank	Y	Y	ER+ PR+
ripretinib	kinase inhibitor	DrugBank
rituximab	CD20	DrugBank
romidepsin	inhibitor of histone deacetylase	DrugBank	Y
rucaparib	PARP1, PARP2, PARP3.	DrugBank	Y
ruxolitinib phosphate	JAK1, JAK2	DrugBank	Y
sacituzumab	trophoblast cell-surface antigen 2 (TROP-2) antibody with the topoisomerase I inhibitor SN-38	DrugBank		Y
selinexor	XPO1	DrugBank	Y
selpercatinib	kinase inhibitor	DrugBank
selumetinib sulfate	MAP2K1, MAP2K2	DrugBank	Y
siltuximab	IL6	DrugBank
sonidegib	SMO	DrugBank	Y
sorafenib	Kinase inhibitor	DrugBank
sunitinib	receptor tyrosine kinase (RTK) inhibitor	DrugBank
tafasitamab-cxix	CD19	DrugBank
tagraxofusp-erzs	IL3RA, ARL2	DrugBank
talazoparib tosylate	PARP1, PARP2	DrugBank	Y	Y	BRCA mutant
tamoxifen	non-steroidal antiestrogen	DrugBank		Y
tazemetostat hydrobromide	EZH2, EZH1	DrugBank	Y
temsirolimus	MTOR	DrugBank	Y
tisagenlecleucel	CD19	DrugBank
toremifene	selective estrogen receptor modulator (SERM)	DrugBank		Y
trametinib	MAP2K1, MAP2K2	DrugBank	Y
trastuzumab	ERBB2	DrugBank	Y	Y	HER2+
tretinoin	differentiating agents	DrugBank
tucatinib	ERBB2, ERBB3	DrugBank	Y	Y	HER2+
vandetanib	kinase inhibitor	DrugBank
vemurafenib	BRAF	DrugBank	Y
venetoclax	BCL2	DrugBank	Y
vismodegib	SMO	DrugBank	Y
vorinostat	histone deacetylase inhibitors	DrugBank	Y
zanubrutinib	BTK	DrugBank	Y
ziv-aflibercept	VEGF	DrugBank	Y
